# Supplementary material for: High-yield photolytic generation of brominated single-walled carbon nanotubes and their application for gas sensing
Source: Royal Society of Chemistry journal article supplement (doi:10.1039/c4cc03702b), 2014-01-01
Supplement: c4cc03702b1.pdf [file c4cc03702b1.pdf]

# High Yield Photolysis of Brominated Single-walled Carbon Nanotubes and their Application for Gas Sensing

D. Hines,<sup>a</sup> M. H. Rummeli,<sup>b,c</sup> D. Adebimpe<sup>\*,d</sup> and D. L. Akins<sup>a,\*</sup>

<sup>a</sup> Department of Chemistry and CASI, The City College of New York and the Graduate School and University Center (CUNY), New York City, NY, USA

<sup>b</sup> IBS Center for Integrated Nanostructure Physics, Institute for Basic Science (IBS), Daejeon 305-701, Republic of Korea

<sup>c</sup> Department of Energy Science, Department of Physics, Sungkyunkwan University, Suwon 440-746, Republic of Korea

<sup>d</sup> Polymath Interscience LLC, Annapolis, MD, USA

\* akins@sci.ccny.cuny.edu, david@polymath.com

## Supporting Information

## Materials and Methods

The N-bromosuccinamide (99 %) was purchased from Sigma Aldrich. Dichloromethane (ACS: 99.5% stab. with amylene), chloroform (HPLC grade: 99.5% min) and di-ethyl ether (99+ %) were purchased from Alfa Aesar. Single-walled carbon nanotubes (purity: 95 wt.%) were purchased from Unidym™ Inc., Sunnyvale, CA, and used without further purification. The individual SWNTs diameters ranged from ca. 0.8 to 1.2 nm; with individual lengths of ca. 100 to 1000 nm. The nanotubes are bundled as ropes; maximum density of 1.6 g/cm<sup>3</sup>. The moisture content for SWNTs dry powder was <5 wt.%.

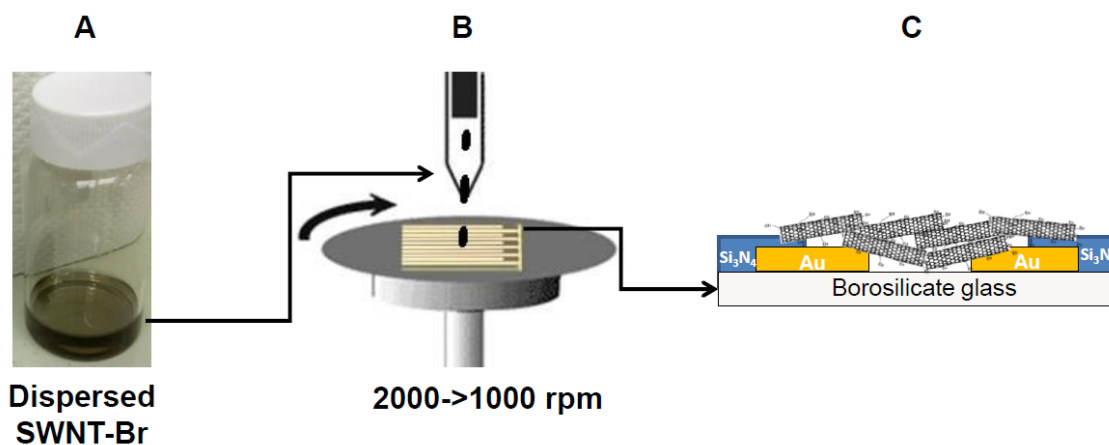

**Figure S1.** Schematic illustration of (a) dispersed Br-SWNT, (b) spin casting onto interdigitated Au electrodes (IDE), and (c) IDE decorated with Br-SWNT.

The experimental setup for the sensor is provided in Figure S2 (of the SI document). It consists of two main subsystems: (a) The vapor delivery and distribution system, which allows one to initially purge the sensor environmental chamber with an inert gas and then to deliver selected quantities of analyte vapor and carrier gas (N<sub>2</sub>, 0.025 l/min.) to the sensing chamber; (b) the response monitoring and data acquisition subsystem, which detects variations in the resistance of the brominated-SWNT mat that changes due to vapor molecule adsorption.

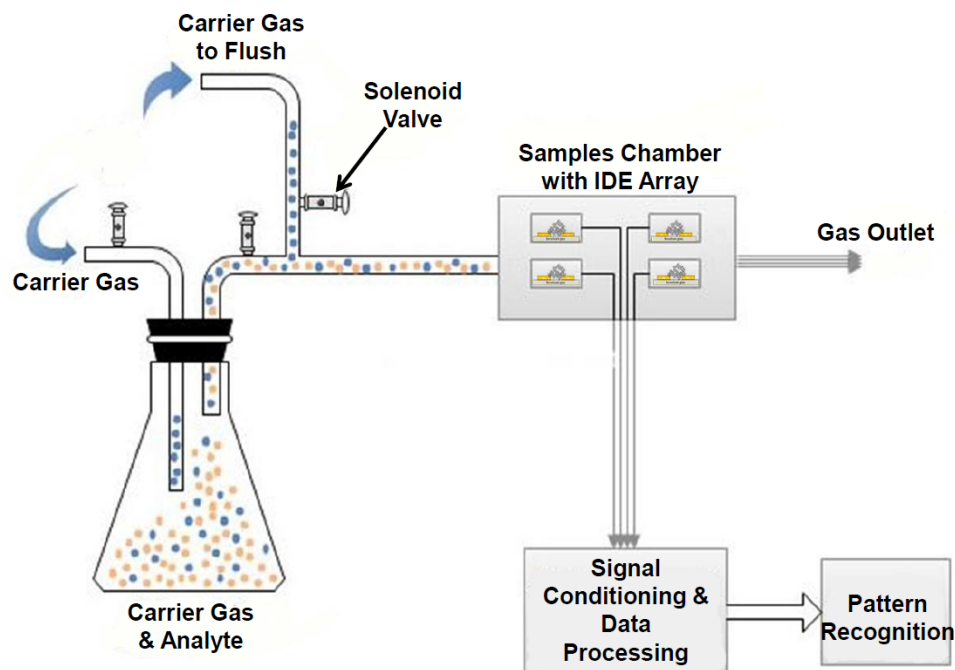

**Figure S2.** Diagram of the vapor delivery, distribution and data acquisition subsystems.

## Characterization Techniques

Raman spectra were collected using a HR800 Horiba Jobin Yvon Raman Microprobe spectrometer. Solid samples were placed on a cover glass and excited with a 632.8 nm HeNe laser radiation (x100 objective lens). Low voltage scanning transmission electron microscopy (SEM) measurements were accomplished using a Zeiss Supra 55VP Scanning Electron Microscope coupled with a Genesis EDX system. For surface topographical imaging of the SWNT mats created for the gas sensing electrodes, a TopoMetrix Explorer AFM was used in the contact mode. Fourier-transform infrared (FTIR) measurements were conducted using a Varian 7000 FTIR. For the FTIR investigations, the SWNT samples (ca. 1 mg) were mixed with KBr and pressed into pellets using standard procedures. Thermogravimetric investigations were accomplished on a TA Instruments Thermogravimetric Analyzer / Differential Scanning Calorimeter (Q600). For this latter system, ca. 12 mg of SWNT samples, pristine or Br-SWNT, were loaded into the sample cell with the reference cell left empty. The sample and reference cells were maintained at 25 °C for 5 minutes, after which they were heated at a rate of 100 °C/min in a nitrogen atmosphere, with a flow rate of 100 mL/min.

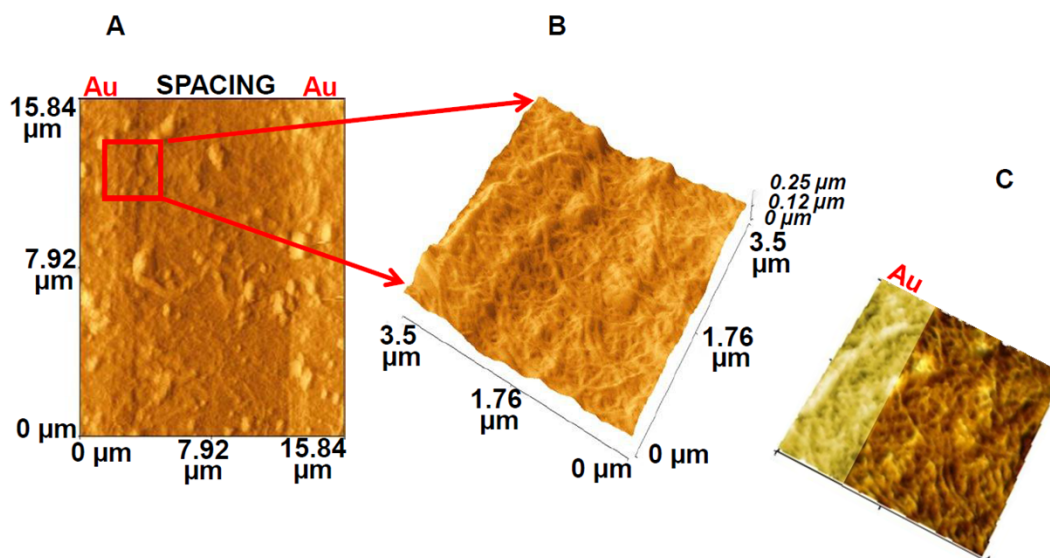

**Figure S3.** AFM images: (A) Br-SWNT mat bridging adjacent electrodes (acquired at scan rate: 32 μm/s). (B) 3D image showing scan of highlighted region in (A); note the presence of Br-SWNTs on electrode as well as in the channel between electrodes. (C) Highlighted Au electrode using semitransparent color.

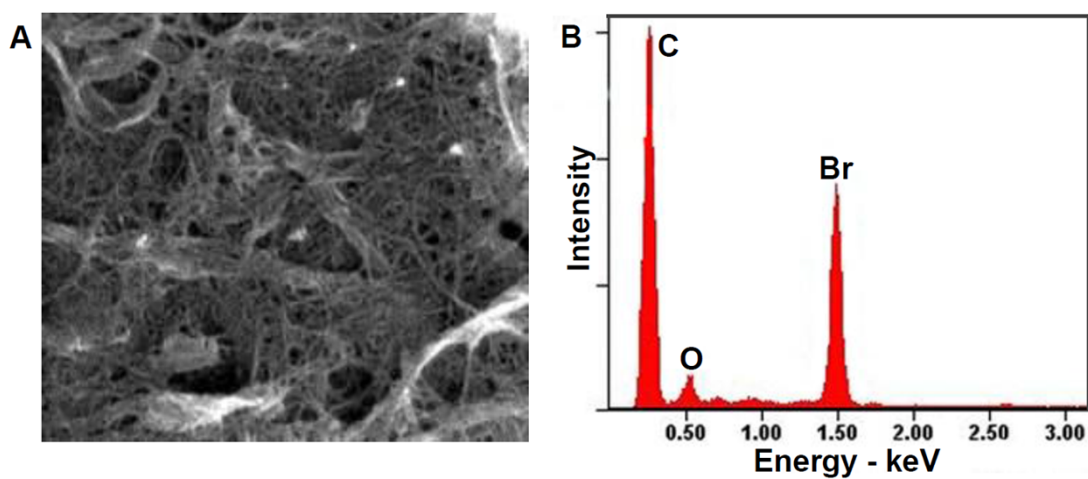

**Figure S4.** (A) SEM surface and (B) elemental analysis of Br-SWNT sample.

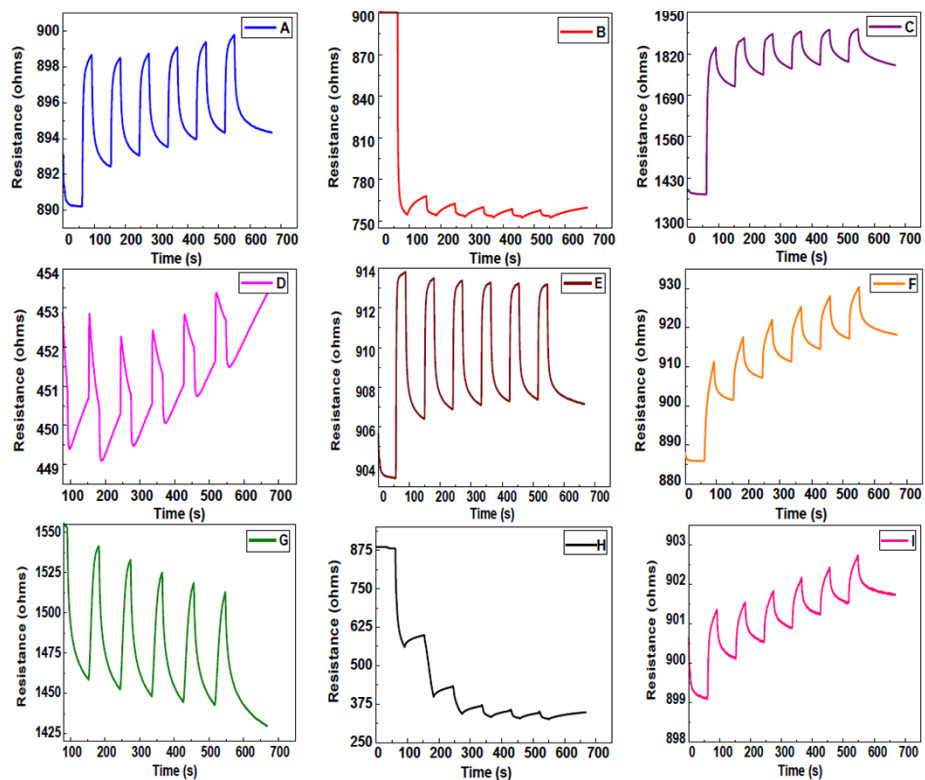

**Figure S5.** Sensor response data of the gas sensor using Br-SWNT as sensing agent for (A) ethanol, (B) HCl, (C) ammonia, (D) sulfuric acid, (E) acetonitrile, (F) N,N-dimethylacetamide, (G) acetic acid, (H) nitric acid, and (I) 2-propanol.

**Table S1:** EDX elemental data for different Br-SWNT samples and synthesis times

| Wt.%  | At.% | Synthesis Time (hrs.) | Br-SWNT Samples (†) |
|-------|------|-----------------------|---------------------|
| 12.80 | 2.21 | 48                    | C                   |
| 14.47 | 2.54 | 48                    | C                   |
| 18.27 | 3.36 | 48                    | C                   |
| 19.85 | 3.68 | 24                    | B                   |
| 16.95 | 3.22 | 24                    | B                   |
| 15.81 | 2.87 | 24                    | B                   |
| 7.52  | 1.24 | 12                    | A                   |

† Sample A was brominated for 12 hours; 3 different representative samples B were each brominated for 24 hrs.; 3 different representative samples C were each brominated for 48 hrs.

**Tables S2.** Concentration of Analytes Exposed to Br-SWNT Gas Sensor Element

| analytes              | concentration (ppb) | Density - g/m <sup>3</sup> @<br>20°C | molecular wt.<br>(g/mol) |
|-----------------------|---------------------|--------------------------------------|--------------------------|
| Ethanol               | 608                 | $7.89 \times 10^5$                   | 46.07                    |
| HCl                   | 769                 | $1.18 \times 10^6$                   | 36.46                    |
| Acetonitrile          | 683                 | $7.83 \times 10^5$                   | 41.05                    |
| N,N-dimethylacetamide | 322                 | $9.37 \times 10^5$                   | 87.12                    |
| Ammonia               | 1645                | $5.988 \times 10^3$                  | 17.03                    |
| Acetic Acid           | 467                 | $1.049 \times 10^6$                  | 60.05                    |
| Nitric Acid           | 445                 | $1.413 \times 10^6$                  | 63.01                    |
| Sulfuric Acid         | 286                 | $1.284 \times 10^6$                  | 98.08                    |
